# Supplementary material for: Direct measurement of ˙OH and HO2˙ formation in ˙R + O2 reactions of cyclohexane and tetrahydropyran
Source: Royal Society of Chemistry journal article supplement (doi:10.1039/c7cp08164b), 2018-01-01
Supplement: c7cp08164b1.zip [file c7cp08164b1.zip]

# Direct Measurement of OH and HO<sub>2</sub> Formation in R + O<sub>2</sub> Reactions of Cyclohexane and Tetrahydropyran: Influence of Oxygenation in Cyclic Hydrocarbons

## Supplementary Materials

Ming-Wei Chen<sup>a\*</sup>, Brandon Rotavera<sup>b,c</sup>, Wen Chao<sup>d,e</sup>, Judit Zádor<sup>a</sup>, Craig A. Taatjes<sup>a\*</sup>

a Combustion Research Facility, Sandia National Laboratories, Livermore, California 94550, USA

b College of Engineering, University of Georgia, Athens, Georgia 30602, USA

c Department of Chemistry, University of Georgia, Athens, Georgia 30602, USA

d Institute of Atomic and Molecular Sciences, Academia Sinica, Taipei 10617, Taiwan

e Department of Chemistry, National Taiwan University, Taipei 10617, Taiwan

### A. Rate coefficients from ME calculations

**Table S1.** Theoretical rate coefficients (cm<sup>3</sup> s<sup>-1</sup>) at 20 Torr of cyclohexyl + O<sub>2</sub> obtained from ME calculations based on the previous study<sup>1</sup> at temperatures relevant to the present work.

|       | R+O <sub>2</sub> → |          |          |          |                 |                 |                 |                 |
|-------|--------------------|----------|----------|----------|-----------------|-----------------|-----------------|-----------------|
| T (K) | ROO                | QOOH1    | QOOH2    | QOOH3    | HO <sub>2</sub> | OH <sup>a</sup> | OH <sup>b</sup> | OH <sup>c</sup> |
| 500   | 7.90E-12           | 8.60E-18 | 6.00E-14 | 4.18E-15 | 1.89E-13        | 1.21E-14        | 3.08E-14        | 1.03E-14        |
| 550   | 6.65E-12           | 1.53E-17 | 6.64E-14 | 4.56E-15 | 3.22E-13        | 2.05E-14        | 6.02E-14        | 1.97E-14        |
| 600   | 5.43E-12           | 8.30E-17 | 7.27E-14 | 4.63E-15 | 4.92E-13        | 3.13E-14        | 1.01E-13        | 3.22E-14        |
| 650   | 4.35E-12           | 4.78E-17 | 6.09E-14 | 3.95E-15 | 6.39E-13        | 4.05E-14        | 1.39E-13        | 4.36E-14        |
| 700   | 3.34E-12           | 2.90E-17 | 5.48E-14 | 3.37E-15 | 7.85E-13        | 4.98E-14        | 1.78E-13        | 5.51E-14        |
| 750   | 2.47E-12           | 2.35E-17 | 4.68E-14 | 2.73E-15 | 8.98E-13        | 5.68E-14        | 2.09E-13        | 6.42E-14        |

<sup>a</sup> OH produced from the pathway along QOOH1.

<sup>b</sup> OH produced from the pathway along QOOH2.

<sup>c</sup> OH produced from the pathway along QOOH3.

**Table S2.** Theoretical rate coefficients ( $\text{s}^{-1}$ ) at 20 Torr of cyclohexyl peroxy decomposition and isomerization obtained from ME calculations based on the previous study<sup>1</sup> at temperatures relevant to the present work.

|       | ROO $\rightarrow$ |          |        |         |                 |                 |                 |                 |
|-------|-------------------|----------|--------|---------|-----------------|-----------------|-----------------|-----------------|
| T (K) | R+O <sub>2</sub>  | QOOH1    | QOOH2  | QOOH3   | HO <sub>2</sub> | OH <sup>a</sup> | OH <sup>b</sup> | OH <sup>c</sup> |
| 500   | 1.28E-1           | 1.09E-2  | 3.81   | 5.21E-2 | 4.77E-1         | 2.93E-2         | 2.43E-2         | 6.32E-3         |
| 550   | 3.153             | 0.1402   | 34.15  | 0.6195  | 7.419           | 0.4077          | 0.5329          | 0.1575          |
| 600   | 42.48             | 3.482    | 226.4  | 4.806   | 71.4            | 1.455           | 6.207           | 1.999           |
| 650   | 350.5             | 1.66E-03 | 1219   | 27.25   | 462.1           | 30.78           | 40.78           | 14.62           |
| 700   | 1904              | 1.74E-02 | 5782   | 123.2   | 2110            | 138             | 126.5           | 64.77           |
| 750   | 6711              | 0.1973   | 2.62E4 | 467.3   | 6629            | 429.7           | -403.1          | 136.9           |

<sup>a</sup> OH produced from the pathway along QOOH1.

<sup>b</sup> OH produced from the pathway along QOOH2.

<sup>c</sup> OH produced from the pathway along QOOH3.

**Table S3.** Theoretical rate coefficients ( $\text{cm}^3 \text{s}^{-1}$ ) at 20 Torr of tetrahydropyranyl + O<sub>2</sub> obtained from ME calculations based on adjusting the ROO well depth (+2 kcal/mol) and QOOH1 $\rightarrow$ HO<sub>2</sub> transition state (-2 kcal/mol) to the PES of cyclohexyl + O<sub>2</sub> at temperatures relevant to the present work.

|       | R+O <sub>2</sub> $\rightarrow$ |          |          |          |                 |                 |                 |                 |
|-------|--------------------------------|----------|----------|----------|-----------------|-----------------|-----------------|-----------------|
| T (K) | ROO                            | QOOH1    | QOOH2    | QOOH3    | HO <sub>2</sub> | OH <sup>a</sup> | OH <sup>b</sup> | OH <sup>c</sup> |
| 500   | 6.65E-12                       | 2.34E-17 | 1.25E-13 | 8.30E-15 | 1.26E-12        | 1.94E-14        | 4.53E-14        | 1.52E-14        |
| 550   | 5.07E-12                       | 3.50E-17 | 1.24E-13 | 8.17E-15 | 1.72E-12        | 2.79E-14        | 7.62E-14        | 2.51E-14        |
| 600   | 3.68E-12                       | 1.26E-16 | 1.18E-13 | 7.37E-15 | 2.14E-12        | 3.64E-14        | 1.11E-13        | 3.58E-14        |
| 650   | 2.74E-12                       | 7.91E-17 | 8.63E-14 | 5.61E-15 | 2.28E-12        | 4.16E-14        | 1.37E-13        | 4.33E-14        |
| 700   | 1.90E-12                       | 3.57E-17 | 6.91E-14 | 4.30E-15 | 2.42E-12        | 4.63E-14        | 1.62E-13        | 5.01E-14        |
| 750   | 1.28E-12                       | 2.37E-17 | 5.32E-14 | 3.17E-15 | 2.45E-12        | 4.91E-14        | 1.78E-13        | 5.46E-14        |

<sup>a</sup> OH produced from the pathway along QOOH1.

<sup>b</sup> OH produced from the pathway along QOOH2.

<sup>c</sup> OH produced from the pathway along QOOH3.

**Table S4.** Theoretical rate coefficients ( $\text{s}^{-1}$ ) at 20 Torr of tetrahydropyranyl peroxy decomposition and isomerization obtained from ME calculations based on adjusting the ROO well depth (+2 kcal/mol) and QOOH1 $\rightarrow$ HO<sub>2</sub> transition state (-2 kcal/mol) to the PES of cyclohexyl + O<sub>2</sub> at temperatures relevant to the present work.

|       | ROO $\rightarrow$ |         |         |         |                 |                 |                 |                 |
|-------|-------------------|---------|---------|---------|-----------------|-----------------|-----------------|-----------------|
| T (K) | R+O <sub>2</sub>  | QOOH1   | QOOH2   | QOOH3   | HO <sub>2</sub> | OH <sup>a</sup> | OH <sup>b</sup> | OH <sup>c</sup> |
| 500   | 7.93E-1           | 7.84E-2 | 2.82E+1 | 3.81E-1 | 2.61E+1         | 2.11E-1         | 1.63E-1         | 4.08E-2         |
| 550   | 14.79             | 0.791   | 206.2   | 3.673   | 272             | 2.314           | 2.719           | 0.7773          |
| 600   | 151.9             | 13.26   | 1128    | 23.47   | 1830            | 8.824           | 23.84           | 7.524           |
| 650   | 963.8             | 9.13E-3 | 4971    | 109.9   | 8532            | 108.6           | 113.8           | 41.52           |
| 700   | 4101              | 6.41E-2 | 1.86E+4 | 407.1   | 2.90E+4         | 387.8           | 224.2           | 136.6           |
| 750   | 1.23E+4           | 0.4252  | 6.07E+4 | 1256    | 7.41E+4         | 1030            | -777.7          | 225             |

<sup>a</sup> OH produced from the pathway along QOOH1.

<sup>b</sup> OH produced from the pathway along QOOH2.

<sup>c</sup> OH produced from the pathway along QOOH3.

## B. Data

HO<sub>2</sub> and OH data files are supplied as ASCII format, and collection of traces are also shown in this section.

**Figure S1.** HO<sub>2</sub> data observed from the Cl-initiated cyclohexane oxidation reaction. Symbols are representing every 25<sup>th</sup> data point.

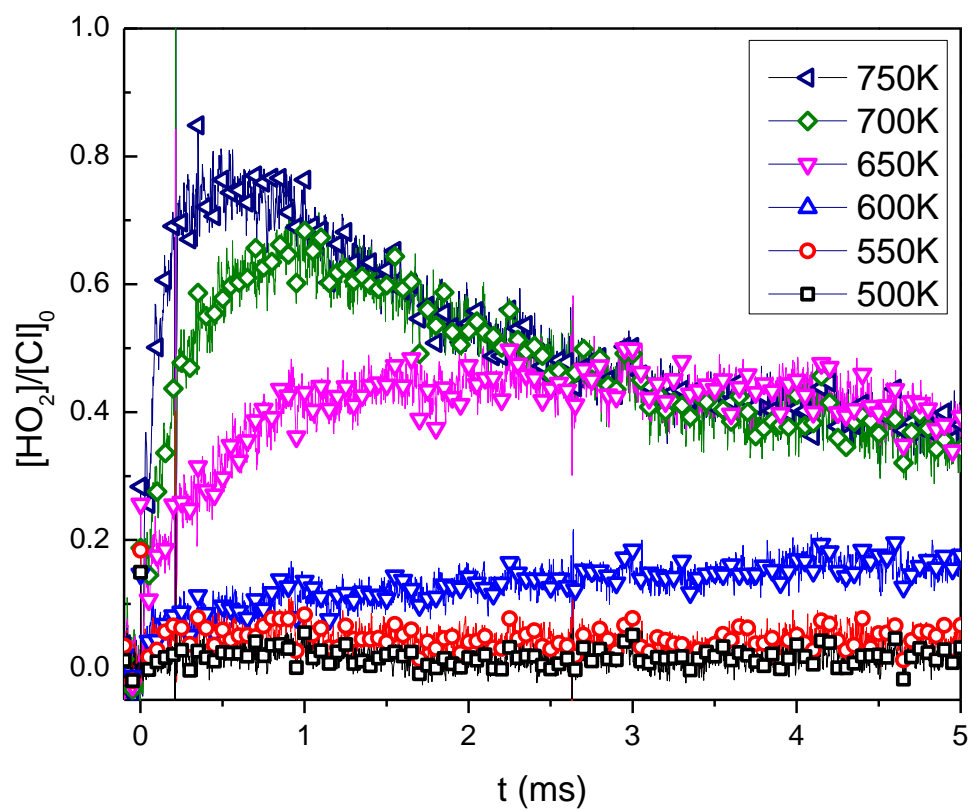

**Figure S2.** HO<sub>2</sub> data observed from the Cl-initiated tetrahydropyran oxidation reaction. Symbols are representing every 25<sup>th</sup> data point.

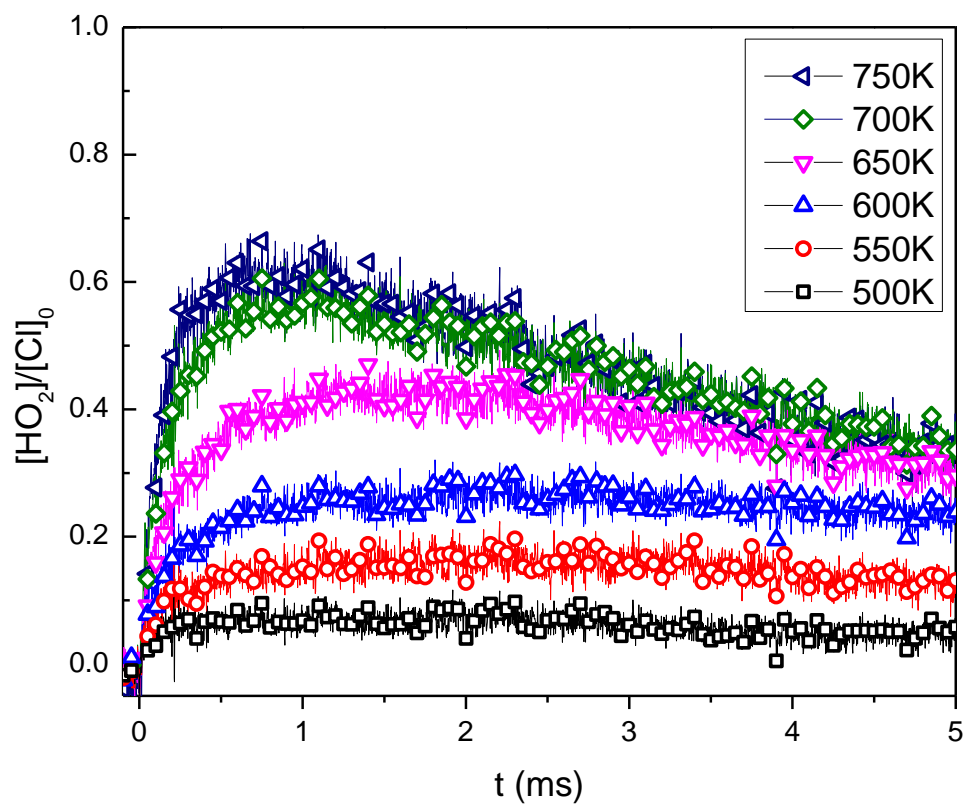

**Figure S3.** OH data observed from the Cl-initiated cyclohexane oxidation reaction.

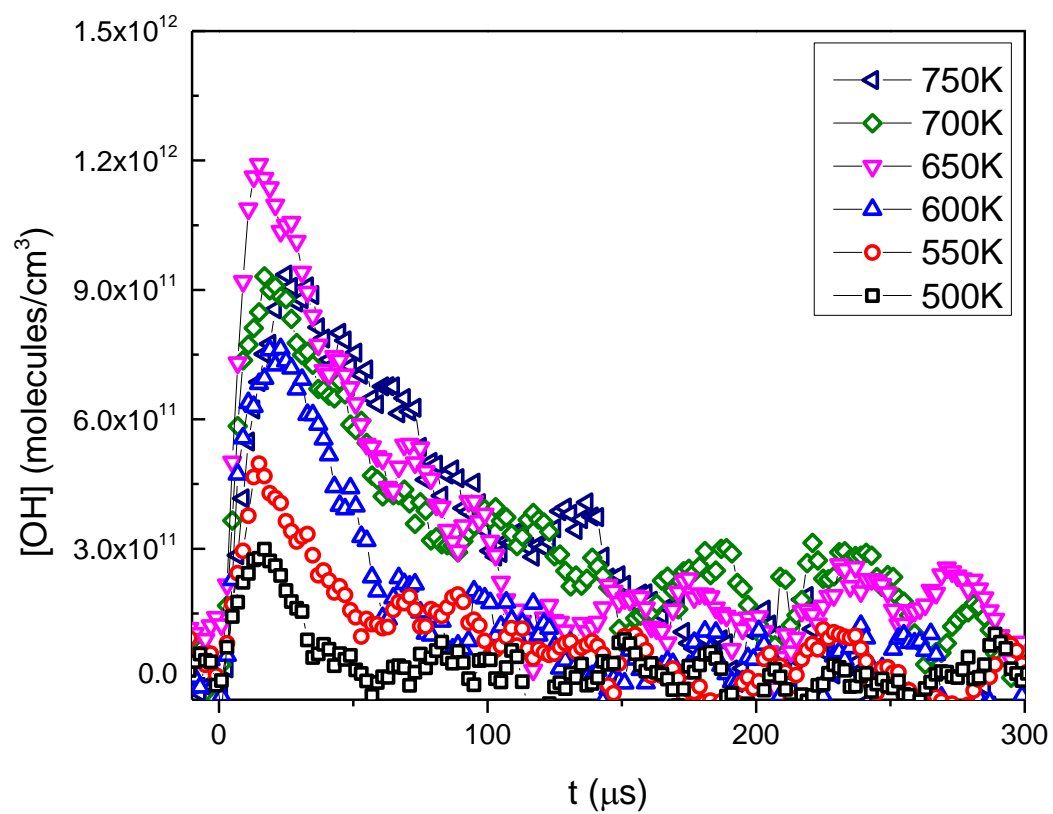

**Figure S4.** OH data observed from the Cl-initiated tetrahydropyran oxidation reaction.

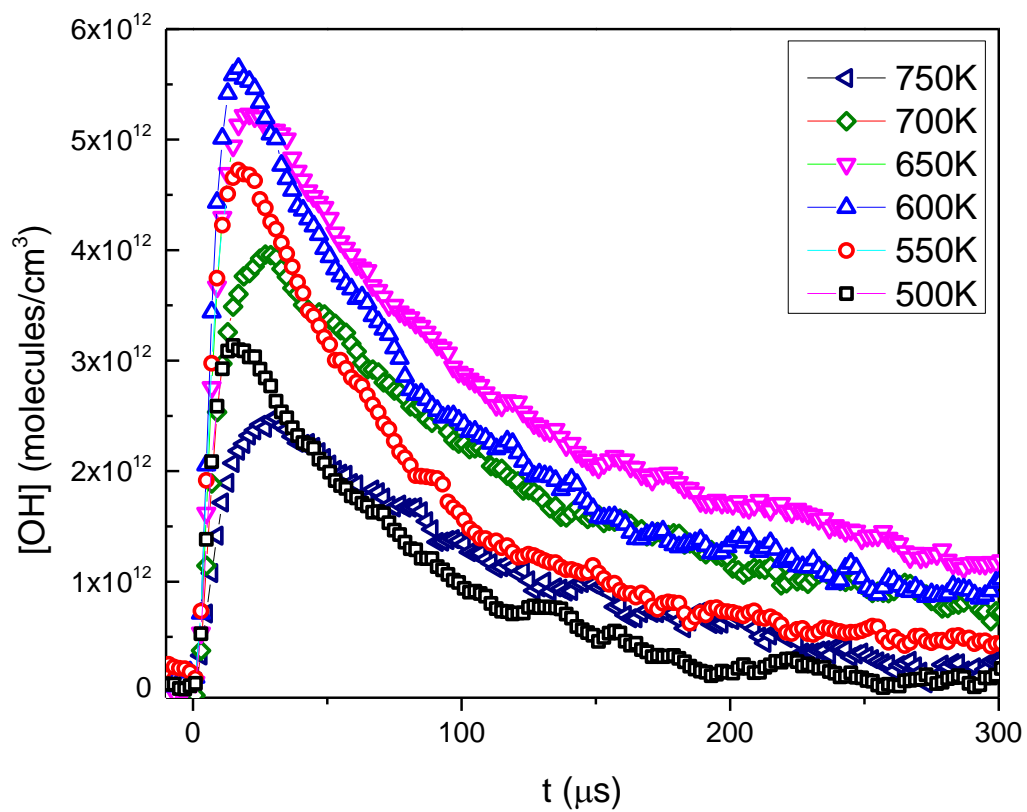

### C. Simple and skeletal kinetic models for tetrahydropyran oxidation.

#### Scheme I: Simple scheme.

Considering the THP-yl (R) decomposition branching from the regular  $R + O_2$  skeleton, the complete scheme of the reduced model for THP oxidation should be:

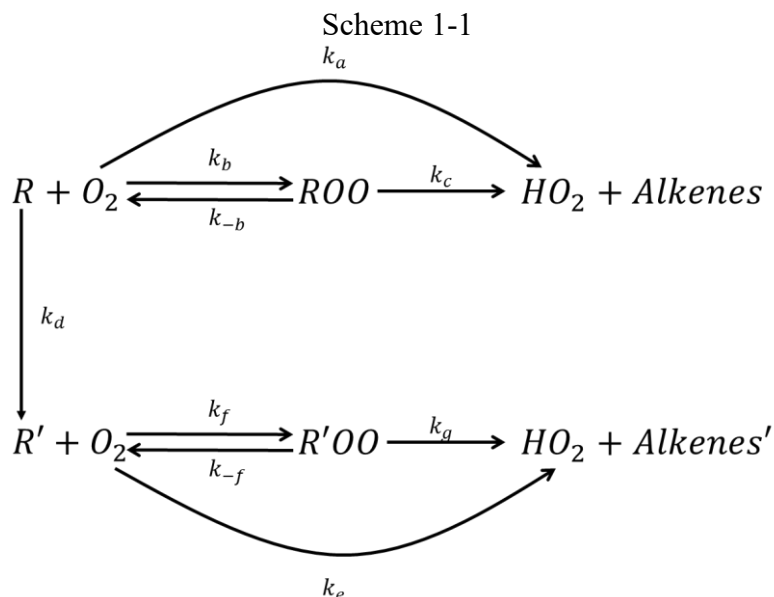

However, the solution of  $[HO_2]_t$  is still very complex even when ignoring the equilibrium between  $R + O_2$  and  $ROO$ :

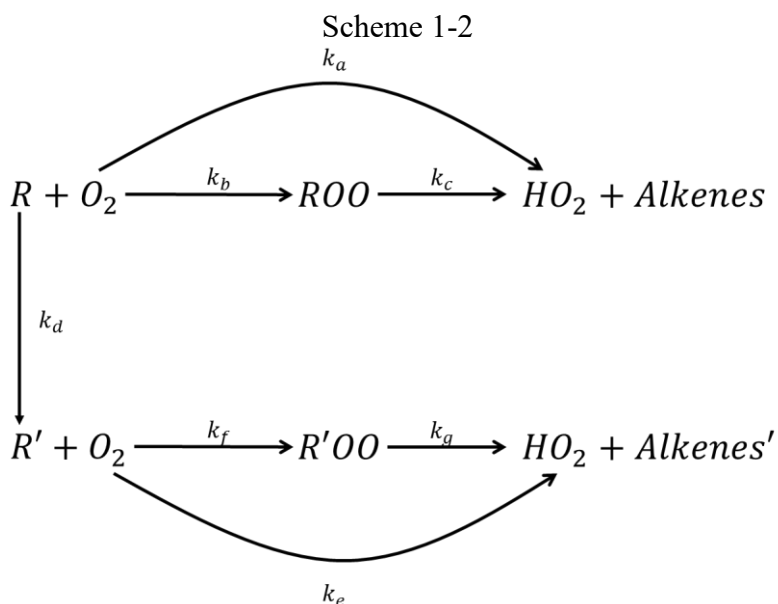

Because it is not reasonable to resolve more than two timescales from the experimental trace, and the two fitted timescales are showing no sequential behavior, an even simpler reaction scheme is illustrative.

#### Scheme II: Skeletal scheme.

A scheme ignoring alkyl peroxy intermediates can simplify the solution of  $[HO_2]_t$ , because we know the two timescales in the  $HO_2$  time profile of THP-yl +  $O_2$  do not show the behavior expected from a



“sequential” mechanism via thermal isomerization and dissociation of QOOH:

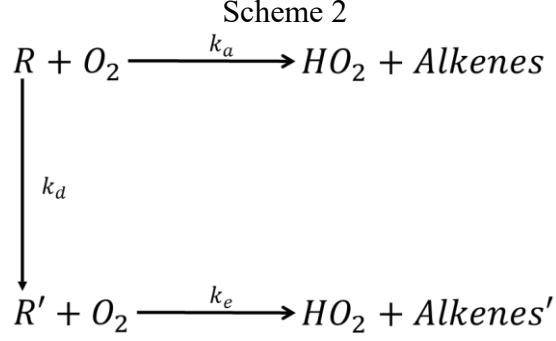

The ordinary differential equations of this simplified scheme are:

$$\frac{d[R]}{dt} = -k_a[O_2][R] - k_d[R] \quad (S1)$$

$$\frac{d[R']}{dt} = -k_a[O_2][R'] + k_d[R] \quad (S2)$$

$$\frac{d[HO_2]}{dt} = k_a[O_2][R] + k_a[O_2][R'] \quad (S3)$$

Then the solutions are:

$$[R]_t = [R]_0 e^{-(k_a[O_2] + k_d)t} \quad (S4)$$

$$[R']_t = \frac{[R]_0 k_d}{-k_a[O_2] + k_e[O_2] - k_d} (e^{-(k_a[O_2] + k_d)t} - e^{-k_e[O_2]t}) \quad (S5)$$

$$[HO_2]_t = \frac{[R]_0}{k_a[O_2] - k_e[O_2] + k_d} \left( (k_a[O_2] - k_e[O_2])(1 - e^{-(k_a[O_2] + k_d)t}) + k_d(1 - e^{-k_e[O_2]t}) \right) \quad (S6)$$

By collecting terms in equation (6), we can obtain:

$$\begin{aligned}
 [HO_2]_t = & \frac{[R]_0(k_a[O_2] - k_e[O_2])}{k_a[O_2] - k_e[O_2] + k_d} (1 - e^{-(k_a[O_2] + k_d)t}) \\
 & + \frac{[R]_0 k_d}{k_a[O_2] - k_e[O_2] + k_d} (1 - e^{-k_e[O_2]t})
 \end{aligned} \quad (S7)$$

which has the same analytical form as the fitting model in the manuscript:

$$[HO_2]_t = A_1(1 - e^{-k_1 t}) + A_2(1 - e^{-k_2 t}) \quad (S8)$$

Where

$$A_1 = \frac{[R]_0(k_a[O_2] - k_e[O_2])}{k_a[O_2] - k_e[O_2] + k_d} \quad (S9)$$

$$A_2 = \frac{[R]_0 k_d}{k_a[O_2] - k_e[O_2] + k_d} \quad (S10)$$

$$k_1 = k_a[O_2] + k_d \quad (S11)$$

$$k_2 = k_e[O_2] \quad (S12)$$

The fitted parameters can be interpreted in different models for the two fuels because the kinetic behavior of the oxidation is different between cyclohexane and tetrahydropyran. In this skeletal model with decomposition of the initial radical, the relative amplitudes of the two components would show a dramatic temperature dependence. The component arising from the ring-opened product would increase with increasing temperature with approximately the activation energy of the radical dissociation; the ratio of  $A_2$  to  $A_1$  is the dissociation rate coefficient divided by the sum of the two pseudo-first order rate coefficients for reaction of the radicals with  $O_2$ . However, only while that component was negligible would the timescales reflect only the “formally direct”  $HO_2$  formation from the initial and from the ring-opened radicals; once  $k_d$  becomes a significant fraction of the pseudo-first order rate coefficients for the oxygen reactions,  $k_1$  should also show the temperature dependence of the radical dissociation. This skeletal scheme therefore does not reproduce the observed behavior and the difference between tetrahydropyran oxidation and cyclohexane oxidation is not simply described by dissociation of the unstable initial radical.

## D. THP-yl dissociation

**Figure S5.** Comparison of theoretical THP-yl dissociation rate coefficient reported in Rotavera et al.<sup>2</sup> to the fitted experimental inverse time constant for fast HO<sub>2</sub> formation

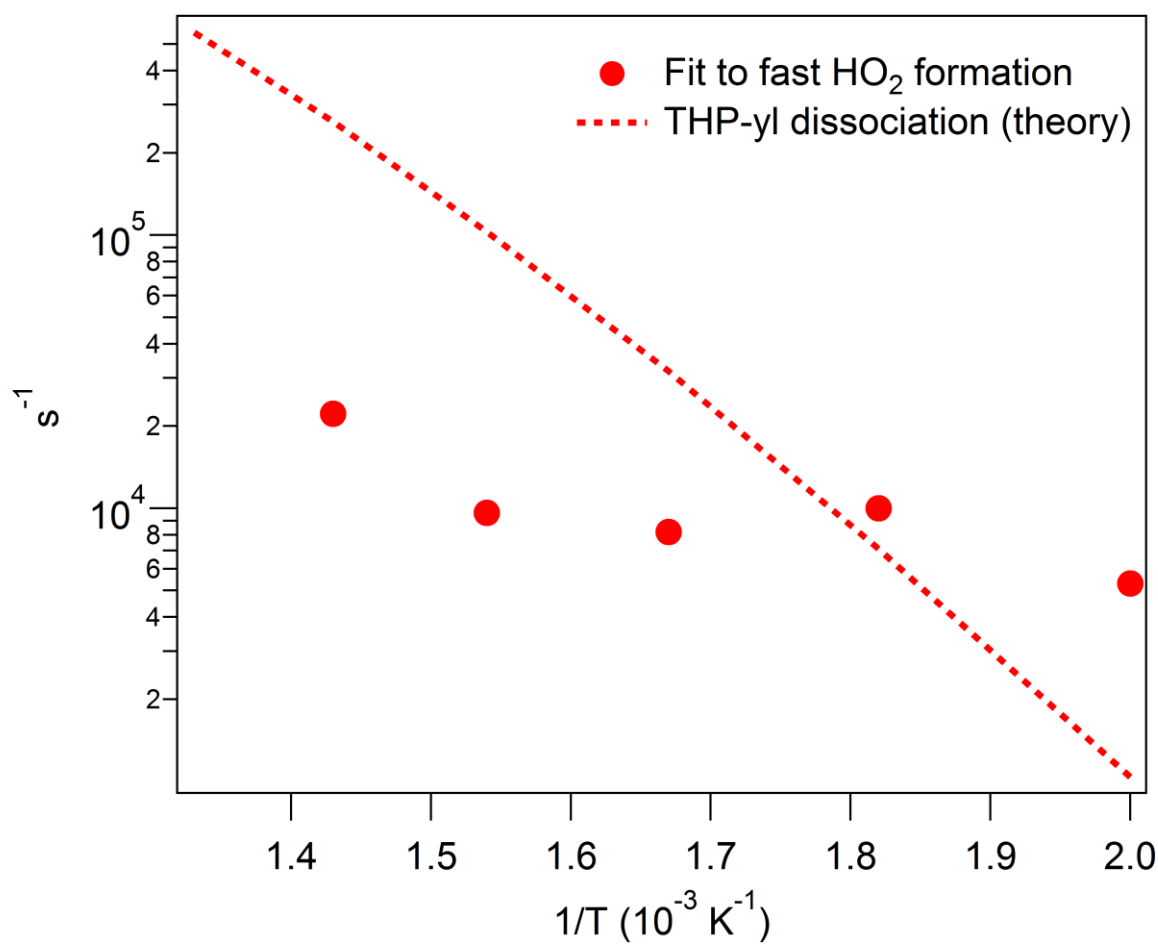

## E. References

1. A. M. Knepp, G. Meloni, L. E. Jusinski, C. A. Taatjes, C. Cavallotti and S. J. Klippenstein, *PCCP*, 2007, **9**, 4315-4331.
2. B. Rotavera, J. D. Savee, I. O. Antonov, R. L. Caravan, L. Sheps, D. L. Osborn, J. Zádor and C. A. Taatjes, *Proc. Combust. Inst.*, 2017, **36**, 597-606.
